1 **Diploid chromosome-scale assembly of the *Muscadinia rotundifolia***  
2 **genome supports chromosome fusion and disease resistance gene**  
3 **expansion during *Vitis* and *Muscadinia* divergence**

4

5 Noé Cochetel, Andrea Minio, Amanda M. Vondras, Rosa Figueroa-Balderas, and Dario Cantu\*  
6 Department of Viticulture and Enology, University of California Davis, Davis, California, USA

7

8 Reference numbers for data available in public repositories:

9 - NCBI: PRJNA635946 and PRJNA593045

10 - Zenodo DOI: 10.5281/zenodo.3866087

11

12 **Running title (35 char. max):** The genome of *Muscadinia rotundifolia*

13

14 **Key words:** Muscadine grapes, Vitaceae evolution, Optical maps, Hybrid genome assembly, Full  
15 length cDNA sequencing, Disease resistance, Powdery mildew

16

17 **Corresponding author:** Dario Cantu, University of California, Davis, 95616 CA. Tel.: (530) 752-  
18 2929. Email: [dacantu@ucdavis.edu](mailto:dacantu@ucdavis.edu)

19 **ABSTRACT (250 words max)**

20 *Muscadinia rotundifolia*, the muscadine grape, has been cultivated for centuries in the southeastern  
21 United States. *M. rotundifolia* is resistant to many of the pathogens that detrimentally affect *Vitis*  
22 *vinifera*, the grape species commonly used for winemaking throughout Europe and in New World  
23 wine regions. For this reason, *M. rotundifolia* is a valuable genetic resource for breeding. Single  
24 molecule real-time reads were combined with optical maps to reconstruct the two haplotypes of  
25 each of the 20 *M. rotundifolia* cv. Trayshed (Trayshed, henceforth) chromosomes. Completeness  
26 and accuracy of the assembly was confirmed using a high-density linkage map of *M. rotundifolia*.  
27 Protein-coding genes were annotated using an integrated comprehensive approach that included  
28 full-length cDNA sequencing (Iso-Seq) to improve gene structure and hypothetical spliced variant  
29 predictions. Our data confirmed the fusion of chromosomes 7 and 20, which reduced the number  
30 of chromosomes in *Vitis* versus *Muscadinia* and pinpointed the location of the fusion in Cabernet  
31 Sauvignon and PN40024 chromosome 7. The numbers of nucleotide binding site leucine-rich  
32 repeats (NBS-LRR) in Trayshed and Cabernet Sauvignon were similar, but their locations were  
33 different. A dramatic expansion of the Toll/Interleukin-1 Receptor-like-X (TIR-X) class was  
34 detected on Trayshed chromosome 12 at the *Resistance to Uncinula necator 1 (RUN1)/ Resistance*  
35 *to Plasmopara viticola 1 (RPV1)* locus, which confers strong dominant resistance to powdery and  
36 downy mildew. A genome browser for Trayshed, its annotation, and an associated Blast tool are  
37 available at [www.grapegenomics.com](http://www.grapegenomics.com).

## 38 INTRODUCTION

39 *Muscadinia rotundifolia* is the foundation of the muscadine grape industry in the United States of  
40 America (USA), where its fruit, juice, and wine are produced (Olien 1990). *M. rotundifolia* is  
41 native to the warm and humid southeastern USA. Its natural habitat includes the states bordering  
42 the Gulf of Mexico and extends from northern Arkansas to Delaware (Bouquet 1978; Olmo 1986;  
43 Olien 1990; Heintz *et al.* 2019). *Muscadinia* is a distinct genus closely related to the species best  
44 known for winemaking, *Vitis vinifera* (Small 1913; Bouquet 1978; Olmo 1986; Olien 1990).

45  
46 Both *Vitis* and *Muscadinia* belong to the Vitaceae family, which contains 16 other genera and  
47 approximately 950 species (Wen *et al.* 2018). These genera diverged between 18 and 47 million  
48 years ago (Ma) (Wan *et al.* 2013; Liu *et al.* 2016; Ma *et al.* 2018), a process that involved several  
49 chromosome rearrangements (Karkamkar *et al.* 2010; Wen *et al.* 2018). *V. vinifera* has 19  
50 chromosomes ( $2n = 38$ ) (Olmo 1937), but like other genera in Vitaceae, including *Ampelopsis*,  
51 *Parthenocissus* and *Ampelocissus*, *M. rotundifolia* has 20 ( $2n = 40$ ) (Branas 1932; Patil and Patil  
52 1992; Karkamkar *et al.* 2010; Chu *et al.* 2018). Though successful crosses yielding fertile hybrids  
53 have been obtained, early attempts at producing hybrids of *V. vinifera* and *M. rotundifolia* often  
54 resulted in sterile progeny; this and the graft incompatibility observed between the two species  
55 (Patel and Olmo 1955) is thought to be caused by their difference in chromosome number (Ravaz  
56 1902; Dearing 1917; Patel and Olmo 1955; Olmo 1971; Bouquet 1980; Walker *et al.* 1991). SSR  
57 markers and genetic linkage maps revealed that linkage groups LG7 and LG20 in *M. rotundifolia*  
58 correspond to the proximal and the distal regions of chromosome 7 in *V. vinifera* (Blanc *et al.*  
59 2012; Delame *et al.* 2019; Lewter *et al.* 2019). Chromosome 7 in *Vitis* may be derived from the  
60 fusion of its ancestor's chromosomes 7 and 20. The presence of vestigial centromeric and/or  
61 telomeric repeats in chromosome 7 of *V. vinifera* (Lewter *et al.* 2019) and of chromosomes 7 and  
62 20 in *M. rotundifolia* could provide additional support for this hypothesis, insight into the  
63 evolutionary history of Vitaceae, and understanding of the structure and function of the *M.*  
64 *rotundifolia* genome.

65  
66 *M. rotundifolia* is a desirable partner with which to hybridize because it is resistant to stresses,  
67 pests, and diseases that adversely affect *V. vinifera* and cause substantial crop loss (Olmo 1971).  
68 *M. rotundifolia* is resistant to Pierce's disease (*Xylella fastidiosa*) (Ruel and Walker 2006),  
69 phylloxera (*Daktulosphaira vitifolia*) (Ravaz 1902; Davidis and Olmo 1964; Firoozabady and  
70 Olmo 1982), downy mildew (*Plasmopara viticola*) (Olmo 1971; Staudt and Kassemeyer 1995),  
71 powdery mildew (*Erysiphe necator* syn. *Uncinula necator*) (Olmo 1986; Merdinoglu *et al.* 2018),  
72 and other diseases and pests (Ravaz 1902; Olmo 1971; Walker *et al.* 2014). Several loci associated  
73 with resistance to pathogens affecting *V. vinifera* were identified in *M. rotundifolia*, including  
74 *Resistance to Uncinula necator 1 (RUN1)* (Pauquet *et al.* 2001), *RUN2* (Riaz *et al.* 2011),  
75 *Resistance to Erysiphe Necator 5 (REN5)* (Blanc *et al.* 2012), *Resistance to Plasmopara viticola*  
76 *1 (RPV1)* (Merdinoglu *et al.* 2003), and *RPV2* (Merdinoglu *et al.* 2018). However, the lack of a *M.*  
77 *rotundifolia* reference sequence and gene annotation limits gene discovery and the characterization  
78 of these and additional resistance loci.

79  
80 A preliminary contig assembly of the *M. rotundifolia* cv. Trayshed (Trayshed, hereafter) genome  
81 using Single Molecule Real-Time (SMRT) sequencing was instrumental to resolving the genetic  
82 basis of sex determination in grapes (Massonnet *et al.* In Press). Here, we report the phased,  
83 chromosome-scale assembly of Trayshed, which was produced using a hybrid assembly of the

84 SMRT contigs with optical maps. Full-length cDNA isoforms (Iso-Seq) were also sequenced and  
85 used as transcriptional evidence for the annotation of protein coding genes. This assembly and its  
86 annotation were used to identify where *M. rotundifolia* chromosomes 7 and 20 fused to create *V.*  
87 *vinifera* chromosome 7 and to identify genes at disease resistance loci.

88

## 89 MATERIALS AND METHODS

90

### 91 Trayshed chromosome construction

92 Bionano's Next Generation Mapping (NGM) of Trayshed was generated using a Saphyr Genome  
93 Imaging Instrument using DLE-1 non-nicking enzyme (CTTAAG). High-molecular weight DNA  
94 (> 500 kb) was extracted by Amplicon Express (Pullman, WA). DNA was then nicked and labelled  
95 using the SaphyrPrep Kit (BioNano Genomics, San Diego, CA). Labelled DNA was loaded onto  
96 the SaphyrChip nanochannel array for imaging on the Saphyr system (BioNano Genomics).  
97 Imaged molecules longer than 150 kbp were kept. These molecules were then assembled using  
98 BioNano Solve v.3.3 (Lam *et al.* 2012) with parameters described in Supplemental file S1,  
99 generating a 1.18 Gbp consensus genome map with an N50 of 5.6 Mbp. PacBio contigs generated  
100 with FALCON-Unzip as described in Massonnet *et al.* (In Press) were assembled together with  
101 the NGM maps using HybridScaffold v.04122018 (Lam *et al.* 2012). The procedure was  
102 performed in four steps with varying conflict resolution approaches. The scaffolding parameters  
103 alternated from more to less conservative between steps 1 and 2 and between steps 3 and 4. In the  
104 first step, sequences and optical maps were broken ('-B 2 -N 2') when in conflict with one another  
105 (Supplemental file S2). In the second step, the scaffolds produced previously were compared to  
106 the optical maps with scaffolding parameters that were more permissive of conflict between the  
107 two (Supplemental file S3). During the third step, conflicts were resolved by breaking nucleotide  
108 sequences ('-B 1 -N 2') using the conservative set of parameters (Supplemental file S2) to correct  
109 haplotype switching and reduce fragmentation. The fourth step was like the third, but with less  
110 conservative scaffolding parameters (Supplemental file S3). The completeness of the gene space  
111 in the hybrid assembly was estimated by aligning the PN40024 V1 CDS against the Trayshed  
112 assembly using BLAT with default parameters (Kent 2002). PN40024 CDS were filtered prior to  
113 the alignment and included only single-copy genes (i.e., with unique mapping on its genome). The  
114 genomic sequences obtained were organized and sorted in two set of chromosomes with  
115 HaploSync v.1 (<https://github.com/andreaminio/HaploSync>) and based on synteny with *Vitis*  
116 *vinifera* PN40024 chromosomes.

117

118

### 119 cDNA library preparation and sequencing

120 Total RNA from Trayshed leaves was isolated using a Cetyltrimethyl Ammonium Bromide  
121 (CTAB)-based extraction protocol as described in Blanco-Ulate *et al.* (2013). RNA purity was  
122 evaluated with a Nanodrop 2000 spectrophotometer (Thermo Scientific, Hanover Park, IL),  
123 quantity with a RNA broad range kit of the Qubit 2.0 Fluorometer (Life Technologies, Carlsbad,  
124 CA) and integrity using electrophoresis and an Agilent 2100 Bioanalyzer (Agilent Technologies,  
125 CA). Total RNA (300 ng, RNA Integrity Number > 8.0) was used for cDNA synthesis and library  
126 construction.

127

128 An RNA-Seq library was prepared using the Illumina TruSeq RNA sample preparation kit v.2  
129 (Illumina, CA, USA) following Illumina's Low-throughput protocol. This library was evaluated

130 for quantity and quality with the High Sensitivity chip in an Agilent 2100 Bioanalyzer (Agilent  
131 Technologies, CA) and was sequenced in 100bp, paired-end reads, using an Illumina HiSeq4000  
132 sequencer (DNA Technology Core Facility, University of California, Davis). In addition, a cDNA  
133 SMRTbell library was prepared. First strand synthesis and cDNA amplification were  
134 accomplished using the NEBNext Single Cell/Low Input cDNA Synthesis & Amplification  
135 Module (New England, Ipswich, MA, US). These cDNAs were subsequently purified with ProNex  
136 magnetic beads (Promega, WI) following the instructions in the Iso-Seq Express Template  
137 Preparation for Sequel and Sequel II Systems protocol (Pacific Biosciences, Menlo Park, CA).  
138 ProNex magnetic beads (86  $\mu$ l) were used to select amplified cDNA with a mode of 2 kb. At least  
139 80 ng of the size-selected, amplified cDNA were used to prepare the cDNA SMRTbell library.  
140 This was followed by DNA damage repair and SMRTbell ligation using the SMRTbell Express  
141 Template Prep Kit 2.0 (Pacific Biosciences, Menlo Park, CA), following the manufacturer's  
142 protocol. One SMRT cell was sequenced on the PacBio Sequel I platform (DNA Technology Core  
143 Facility, University of California, Davis).

144

### 145 **Genome annotation**

146 The structural annotation of the *M. rotundifolia* genome was performed with a modified version  
147 of the pipeline used for the *Vitis vinifera* cv. Zinfandel genome (Vondras *et al.* 2019) and fully  
148 described here: [https://github.com/andreaminio/AnnotationPipeline-EVM\\_based-DCLab](https://github.com/andreaminio/AnnotationPipeline-EVM_based-DCLab). Briefly,  
149 transcript evidence was obtained from external databases and by combining multiple strategies to  
150 build transcriptome assemblies from RNA-Seq sample using Stringtie v.1.3.4d (Pertea *et al.* 2015)  
151 and Trinity v.2.6.5 (Grabherr *et al.* 2011). In addition, PASA v.2.3.3 (Haas 2003) and high quality  
152 Iso-Seq data from Trayshed were used to produce high-quality gene models for training gene  
153 predictors. Public databases, transcriptome assemblies, and the Iso-Seq data described above were  
154 used as transcript and protein evidence. They were mapped on the genome using PASA v.2.3.3  
155 (Haas 2003), MagicBLAST v.1.4.0 (Boratyn *et al.* 2019) and Exonerate v.2.2.0 (Slater and Birney  
156 2005). *Ab initio* predictions were generated using BUSCO v.3.0.2 (Seppey *et al.* 2019), Augustus  
157 v.3.0.3 (Stanke *et al.* 2006), GeneMark v.3.47 (Lomsadze 2005) and SNAP v.2006-07-28 (Korf  
158 2004). Repeats were annotated using RepeatMasker v.open-4.0.6 (Smit *et al.* 2013). Next,  
159 EvidenceModeler v.1.1.1 (Haas *et al.* 2008) used these predictions to generate consensus gene  
160 models. The final functional annotation was produced combining blastp v.2.2.28 (Camacho *et al.*  
161 2009) hits against the Refseq plant protein database (<ftp://ftp.ncbi.nlm.nih.gov/refseq>, retrieved  
162 January 17th, 2019) and InterProScan v.5.28-67.0 (Jones *et al.* 2014) outputs using Blast2GO  
163 v.4.1.9 (Gotz *et al.* 2008).

164

### 165 **Genome size quantification by flow cytometry**

166 DNA content was estimated using flow cytometry (n = 3 individual leaves).  
167 *Lycopersicon esculentum* cv. Stupické polní tyčkové rané was selected as the internal DNA  
168 reference standard with a genome size of  $2C = 1.96$  pg;  $1C = 958$  Mb (Doležel *et al.* 1992). Nuclei  
169 extraction was performed using the Cystain PI absolute P kit (Sysmex America Inc).  
170 Approximately 5 mg (0.7 cm<sup>2</sup>) of young healthy leaves from grapevine and tomato were cut finely  
171 with a razor blade in a Petri dish containing 500  $\mu$ L of extraction buffer. The nuclei suspension  
172 was filtered through a 50  $\mu$ m filter (CellTrics, Sysmex America Inc) and 2 mL of a propidium  
173 iodide staining solution was added (Doležel and Bartoš 2005; Bertier *et al.* 2013). Measurements  
174 were acquired using a Becton Dickinson FACScan (Franklin Lakes, New Jersey) equipped with a  
175 488 nm laser. The data were analyzed using FlowJo v.10



176 (<https://www.flowjo.com/solutions/flowjo>). DNA content was inferred by linear regression using  
177 the tomato DNA reference standard. The genome size was comparable to PN40024 (Jaillon *et al.*  
178 2007), at 487 Mb, but smaller than Cabernet Sauvignon ( $557.0 \pm 2.4$  Mbp; Supplemental Figure  
179 S1).

180

### 181 **Comparison of genome assembly and synteny analysis**

182 The Trayshed and Cabernet Sauvignon (Massonnet *et al.* In Press) genomes were compared with  
183 NUCmer (MUMmer v.4.0.00) (Marçais *et al.* 2018) and the --mum setting. Descriptive statistics  
184 of the alignment were obtained using the MUMmer “dnadiff” option. The delta file was filtered  
185 using delta-filter with these settings: -i 90 -l 7500. Blastp v.2.2.28 (Camacho *et al.* 2009) was used  
186 to align the annotated proteins of Trayshed and Cabernet Sauvignon. Pairwise protein information  
187 was associated with genes and processed with McScanX v.11.Nov.2013 (Wang *et al.* 2012) to  
188 identify syntenic regions.

189

### 190 **Localization of PN40024 SNP markers and telomeric repeats analysis**

191 Five hundred base-pair long genomic regions were extracted upstream and downstream of each  
192 PN40024 V0 SNP marker (Lewter *et al.*, 2019). GMAP v. 2015-11-20 (Wu and Watanabe 2005)  
193 was used to locate these sequences in Trayshed and Cabernet Sauvignon. The previously published  
194 consensus map of *M. rotundifolia* linkage groups was used to assess the completeness of the  
195 chromosome reconstruction (Lewter *et al.* 2019). Sliding windows (window size = 10 markers,  
196 sliding = 5 markers) were designed to move across the uniquely mapped markers on the genome.  
197 The percentage of relative marker positions consistent with their reference positions on the high-  
198 density genetic map was calculated per window. Telomeric repeats of “CCCTAA” and their  
199 reverse complement were searched along chromosome 7 of Cabernet Sauvignon and PN40024 V2  
200 (Canaguier *et al.* 2017) using vmatchPattern from the R package Biostrings v.2.52.0 (H. Pagès *et*  
201 *al.* 2019). After peaks in the distribution of telomeric repeats were identified in both genomes,  
202 genomic regions of Cabernet Sauvignon (chr7:18,675,000-18,677,000 bp) and PN40024  
203 (chr7:17571000-17573000 bp) were extracted. Motif enrichment analysis was performed using  
204 MEME v.5.1.0 (Bailey and Elkan 1994) and reported as “logo” using the ggseqlogo R package  
205 v.0.1 (Wagih 2017).

206

### 207 **Identification of NBS-LRR genes**

208 Predicted proteins from the Trayshed and Cabernet Sauvignon genomes were scanned using  
209 hmmsearch (HMMER v.3.3; <http://hmmer.org/>) with a sequence E-value threshold of 0.001 and  
210 Hidden Markov Models (HMM) corresponding to different Pfam (El-Gebali *et al.* 2019) domains:  
211 NB-ARC (Pfam PF00931), TIR (PF01582) and LRR (PF00560, PF07723, PF07725 and  
212 PF12799). Coiled coil (CC)-containing proteins were identified by COILS (Lupas *et al.* 1991)  
213 during the InterProScan annotation. This set of annotations was divided in six protein classes: CC-  
214 NBS-LRR, CC-NBS, TIR-NBS-LRR, TIR-NBS, NBS-LRR and NBS. To capture the largest  
215 number of potential NBS-LRR related genes, genes lacking the NB-ARC domain but with “NBS-  
216 LRR” functional annotations were also selected and divided in two classes: TIR-X and CC-X. For  
217 these eight protein classes, Multiple EM for Motif Elicitation (MEME) analysis was performed  
218 with the flags -mod anr -nmotifs 20 to identify conserved domains for each class. Then, FIMO  
219 v.5.1.0 (Find Individual Motif Occurrences) (Grant *et al.* 2011) was ran on each protein class using  
220 the corresponding MEME results; proteins with at least five conserved domains were kept. NBS-  
221 LRR gene clusters were defined as groups of at least two NBS-LRR genes, each separated by no

222 more than eight non-NBS-LRR genes (Richly *et al.* 2002) in a region spanning a maximum of 200  
223 kbp (Holub 2001).

224

### 225 ***RUN1/RPV1* locus analysis and NBS-LRR genes phylogeny**

226 Boundaries of the *RUN1/RPV1* locus were defined by mapping two markers, VMC4f3.1 and  
227 VMC8g9 (Barker *et al.* 2005), on Trayshed and Cabernet Sauvignon using GMAP v. 2015-11-20  
228 (Wu and Watanabe 2005). A tblastx (BLAST v.2.2.29) (Camacho *et al.* 2009) was performed  
229 using the genomic region corresponding to the resistance locus in Cabernet Sauvignon as a query  
230 and Trayshed chromosome 12, split in 50-kbp blocks, as a reference. The tblastx results were  
231 filtered, keeping hits with at least 90% of identity, a minimum length of 100 bp, and that were  
232 contained within the boundaries of the resistance locus in both the query and the reference. Lastly,  
233 hits matching LTR retrotransposons were discarded. Proteins corresponding to the first alternative  
234 spliced variant of each NBS-LRR gene of the *RUN1/RPV1* locus were aligned using MUSCLE  
235 v.3.8.31 (Edgar 2004) with default parameters and by including *GAPDH (VIT\_17s0000g10430)*  
236 ortholog sequences as an outgroup. Distances between the alignments were extracted using the R  
237 package seqinr v.3.6.1 (Charif and Lobry 2007). The estimation of the corresponding neighbor-  
238 joining tree, its rooting, and the bootstrapping (1000 replicates) were performed using the R  
239 package ape v.5.3 (Paradis and Schliep 2019). The tree was drawn using ggtree v.2.0.2 (Yu *et al.*  
240 2017). Coding sequences of the two Trayshed-specific gene clusters were aligned per class using  
241 MACSE v.2.03 (Ranwez *et al.* 2018) and trimmed using the option  
242 min\_percent\_NT\_at\_ends=0.80. Prior to the alignment, outliers were removed based on sequence  
243 length. Synonymous substitution rates (dS) were obtained using yn00 from PAML v.4.9f (Yang  
244 2007).

245

### 246 **Data analysis and visualization**

247 Data were parsed with R v.3.6.0 (R Core Team 2019) in RStudio v.1.2.5033 (RStudio Team 2019)  
248 using tidyverse v.1.3.0 (Wickham *et al.* 2019), GenomicFeatures v.1.36.4 for genomic ranges  
249 manipulation (Lawrence *et al.* 2013), rtracklayer for GFF files v.1.44.4 (Lawrence *et al.* 2009) and  
250 viridis v.0.5.1 for the color gradients (Garnier 2018).

251

### 252 **Data availability**

253 Sequencing data are accessible at NCBI repository under the accession PRJNA635946 and  
254 PRJNA593045. Raw optical maps are available at Zenodo under the DOI  
255 10.5281/zenodo.3866087. The supplemental files are available at Figshare. The pipeline for the  
256 gene annotation is available at [https://github.com/andreaminio/AnnotationPipeline-EVM\\_based-DClab](https://github.com/andreaminio/AnnotationPipeline-EVM_based-DClab). Assembly and annotation files are available at [www.grapegenomics.com](http://www.grapegenomics.com), which also hosts  
257 a genome browser and a blast tool for Trayshed.

258

259

260

261

262

263

264

265

266

267

## 261 **RESULTS AND DISCUSSION**

### 263 **Construction of the twenty phased chromosomes of *Muscadinia rotundifolia* cv. Trayshed**

264 We reconstructed the twenty Trayshed chromosomes using optical maps produced with BioNano  
265 Genomics technology at 2,057x coverage. The BioNano consensus genome map was combined  
266 with the contigs produced from Single Molecule Real-Time (SMRT; Pacific Biosciences) long-  
267 reads to generate a hybrid genome assembly. The size of the hybrid assembly (898.5 Mbp) was

268 nearly twice as large as the expected haploid genome size of Trayshed as determined by flow  
269 cytometry ( $483.4 \pm 3.1$  Mbp; Supplemental Figure S1). To assess the gene content in the hybrid  
270 assembly, we carried out a BUSCO analysis (Seppey *et al.* 2019) and mapped the PN40024 genes  
271 on the scaffolds using BLAT (Kent 2002). About 66% of the BUSCO genes were found duplicated  
272 and  $2.16 \pm 1.06$  copies of the PN40024 genes aligned to the scaffolds. The size of the assembly,  
273 the amount of duplicated BUSCO genes (Supplemental Table S1) and the two-fold PN20024 gene  
274 content are strong evidence that the scaffolds obtained by hybrid assembly represent the diploid  
275 genome of Trayshed. To separate homologous copies, we split the assembly into two phased sets  
276 of scaffolds (Haplotype 1, Hap1, and Haplotype 2, Hap2; Table 1) using haplosync, which sort the  
277 assembled sequences in chromosome structure while segregating them in non-overlapping sets of  
278 alternative haplotypes by homology with a related species, *Vitis vinifera* cv. PN40024. The  
279 structure of the Trayshed assembly was confirmed by comparing the positions along each  
280 chromosome of the PN40024 V0 markers with their reported position on linkage groups (LG;  
281 Lewter *et al.* (2019)) (Supplemental Figure S2 and S3). More than 80% of the markers' positions  
282 were in agreement between the genetic and physical maps, with strong overall correlation ( $R >$   
283  $0.90$ ) along all chromosomes (Supplemental Figure S2).

284  
285

**Table 1. Genome assembly statistics**

|                                       | <b>Haplotype 1</b> | <b>Haplotype 2</b> | <b>Unplaced</b> |
|---------------------------------------|--------------------|--------------------|-----------------|
| <b>Assembly length (bp)</b>           | 460,586,882        | 302,699,902        | 136,115,388     |
| <b>Number of scaffolds</b>            | 20                 | 20                 | 1,784           |
| <b>Average length (bp)</b>            | 23,029,344         | 15,134,995         | 76,297          |
| <b>Maximum length (bp)</b>            | 37,866,691         | 23,149,288         | 11,053,884      |
| <b>N50 length (bp)</b>                | 24,189,316         | 15,419,175         | 314,857         |
| <b>Total gap length (bp)</b>          | 24,598,680         | 29,789,394         | 19,410,932      |
| <b>Repetitive content (%)</b>         | 40.52              | 37.80              | 42.51           |
| <b>Number of protein-coding genes</b> | 27,924             | 17,829             | 6,661           |
| <b>Complete BUSCO single copy (%)</b> | 95.1               | 68.6               | 18.6            |

286  
287  
288  
289  
290  
291  
292  
293  
294  
295

**Analysis of chromosome structure supports a fusion of chromosomes 7 and 20 in *Vitis***

MUMMER was used to compare the structure of Trayshed with the chromosome-scale Cabernet Sauvignon assembly (Massonnet *et al.* In Press), which is the most complete and contiguous genome assembly of grapevine available to date. The two genomes were highly syntenic (Figure 1A). On average, colinear regions were 2,484 bp long and shared 92.46% identity (Supplementary Table S1). On average, insertions were 25-bp long and deletions were 15-bp long. The longest deletion (~50 kb) was detected on chromosome 8 of Cabernet Sauvignon while the longest insertion (78 kb) was observed on chromosome 11 (Supplemental Table S2).

296  
297  
298  
299

Trayshed chromosomes 7 and 20 aligned at the beginning and end, respectively, of Cabernet Sauvignon chromosome 7. This confirms the fusion of these two chromosomes in *Vitis* that was previously reported using genetic maps (Blanc *et al.* 2012; Lewter *et al.* 2019) (Figure 1A).



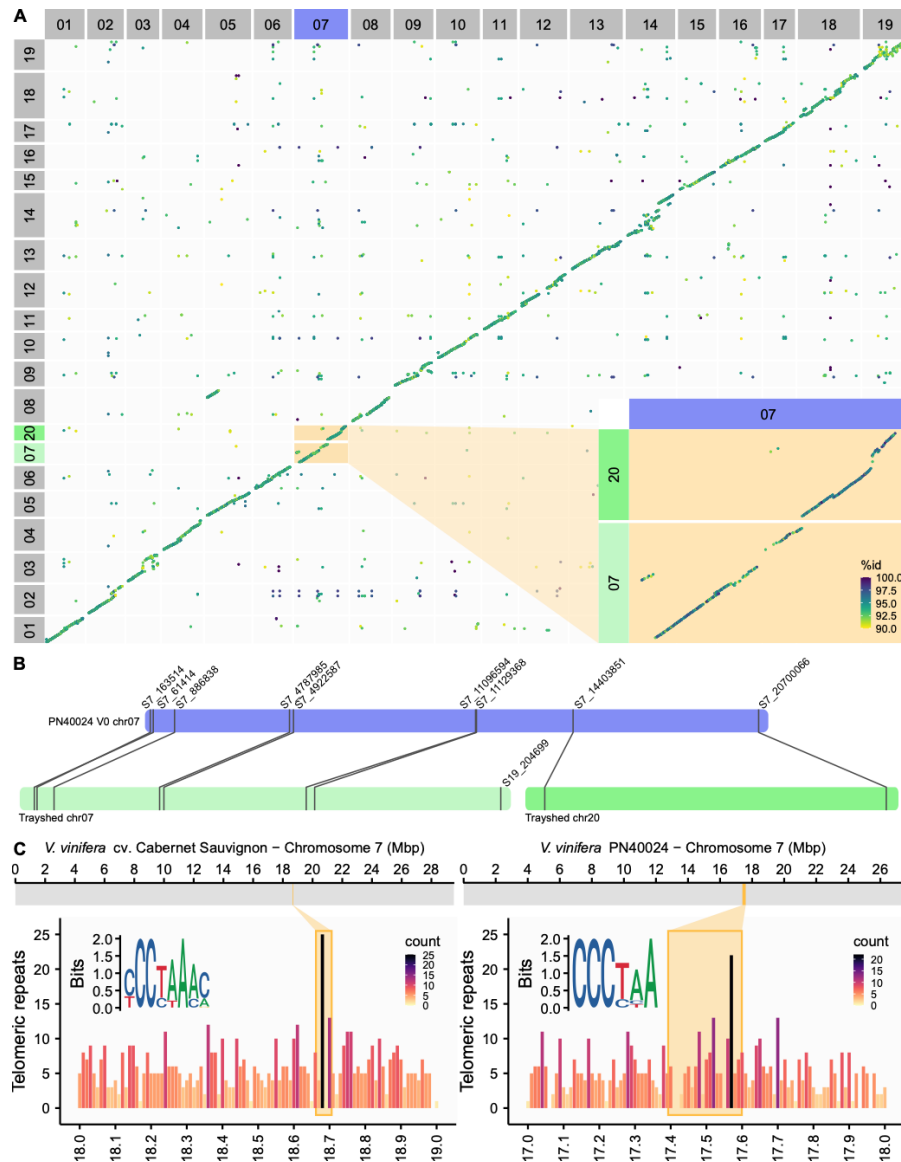

**Figure 1: Chromosome fusion localization in *Vitis vinifera***

A. Whole genome alignment of Trayshed (y-axis) on Cabernet Sauvignon (x-axis). The putative fusion of Trayshed chromosomes 7 and 20 of Trayshed (green) and Cabernet Sauvignon chromosome 7<sup>th</sup> (purple) is inset. The percent identity (% id) between the alignments is displayed as a color gradient. B. The positions of markers on Trayshed chromosomes 7 and 20 (green) and their corresponding location on PN40024 V0 chromosome 7. C. The distribution of telomeric repeats in 1 Mbp containing the expected chromosome fusion in Cabernet Sauvignon (left panel) and PN40024 (right panel). The frequency of telomere repeats is represented as a color gradient. The most enriched motif in the 2-kbp region surrounding the peak of telomeric repeats is inset for each genotype.

300  
301  
302  
303  
304  
305  
306  
307  
308  
309  
310  
311

The marker-containing regions used for Trayshed chromosome structure validation also support this hypothesis; all markers aligning Trayshed LG 7 and 20 were associated with *V. vinifera* chromosome 7 (Figure 1B). Telomere repeats can be used as indicators of chromosome number reduction rearrangements (Sousa and Renner 2015). An enrichment of these sequences is expected in a genomic region if a fusion occurred. To determine the position of chromosome fusion in

317 Cabernet Sauvignon, we searched for telomeric repeats in the region of chromosome 7 that should  
318 contain the fusion point based on nucmer alignments. We examined the genomic region of  
319 Cabernet Sauvignon chromosome 7 that spanned Trayshed chromosome 7 and 20 (chr 7:  
320 18,661,815 – 18,705,855 bp; Figure 1C, top panel) and found an enrichment of telomeric repeats  
321 in this region. (Figure 1C, bottom panel). A similar pattern was detected in the hypothetical fusion  
322 region of PN40024 (chr 7: 17,392,916 - 17,599,237 bp; Figure 1C). Together, these data support  
323 a chromosome number reduction by fusion in *V. vinifera* when compared with *M. rotundifolia*.

324

### 325 **Full length cDNA sequencing and annotation of the protein-coding genes**

326 Together with the public data and RNA-Seq data already available, high-quality full-length cDNA  
327 sequences (Iso-Seq; Pacific Biosciences, Supplemental Figure S4) were generated to be used as  
328 transcriptional evidence for gene model predictions. From leaf tissues, 336,932 raw reads were  
329 sequenced, clustered, and error corrected with LSC (Au *et al.* 2012) to generate 34,558 high-  
330 quality isoforms, 260 low-quality isoforms, and 111,672 singletons (Supplemental Figure S4).  
331 After obtaining consensus gene models, alternative splice variants were predicted if supported by  
332 Iso-Seq data, with 1.58 transcripts per gene on average (Supplemental Figure S4). BUSCO genes  
333 (97.6%) were well-represented in the diploid Trayshed transcriptome. The structural annotation  
334 included 52,414 protein coding genes (Table 1) and 83,010 proteins (including the alternative  
335 forms). There were 27,924 and 17,829 genes on haplotypes 1 and 2, respectively (Table 1). The  
336 repetitive content composed 39.90% of the genome. On average, colinear blocks of homologous  
337 genes were ~ 28-genes long (Supplemental Table S3) based on McScanX results. The longest  
338 block of colinear genes was found on chromosome 6 and contained 695 genes (Supplemental Table  
339 S3). Based on blastp results with an inclusive filtering threshold set at 70% for both query and  
340 target coverage and identity, 50,670 (96.7%) Trayshed genes are homologous with 52,684  
341 (91.78%) genes of Cabernet Sauvignon. The 1,890 proteins that did not have a potential ortholog  
342 in Cabernet Sauvignon were significantly enriched in functional categories related to compound  
343 metabolic process ( $P < 1e-04$ ; Fisher's exact test).

344

### 345 **NBS-LRR intracellular receptors encoded in the Trayshed genome**

346 Trayshed is attractive to grape breeding programs because it is resistant to pathogens that affect *V.*  
347 *vinifera*. In plants, resistance to pathogens is primarily attributed to the activity of resistance genes  
348 (R-genes). Nucleotide binding site leucine-rich repeat (NBS-LRR) genes constitute the largest  
349 family of R-genes. NBS-LRR genes are associated with resistance to powdery and downy mildew  
350 pathogens in several species, including *Arabidopsis* (Warren *et al.* 1998), wheat (He *et al.* 2018),  
351 barley (Wei *et al.* 1999; Zhou *et al.* 2001), pepper (Jo *et al.* 2017), and grapes (Riaz *et al.* 2011;  
352 Zini *et al.* 2019).

353

354 We divided the NBS-LRR genes in eight different classes depending on the domain detected in  
355 the proteins: CC-NBS-LRR, CC-NBS, CC-X, TIR-NBS-LRR, TIR-NBS, TIR-X, NBS-LRR, NBS  
356 (called hereafter NBS-LRR when described as a whole). Overall, the Trayshed genome has slightly  
357 more NBS-LRR genes (1,075) than Cabernet Sauvignon (1,009). Most NBS-LRR genes were  
358 found on chromosomes 12 and 13 (91 genes on each; 1.54 and 1.21x more than Cabernet  
359 Sauvignon, respectively), followed by chromosome 19 (58 genes; 1.49x more than Cabernet  
360 Sauvignon) (Figure 2A, Supplementary Table S4). In both species, chromosome 4 contained the  
361 fewest NBS-LRR genes (2). In Cabernet Sauvignon (Figure 2B, Supplementary Table S4), most  
362 NBS-LRR genes were detected on chromosome 13 (75 genes), 9 (72 genes; 1.57x more than

363 Trayshed) and 18 (65 genes; 1.38x more than Trayshed). Within the genome, NBS-LRR genes  
364 form clusters that could be critical to their function as resistance loci (Hulbert *et al.* 2001; Meyers  
365 *et al.* 2003). The number of clusters detected in Trayshed (123) was slightly higher than in  
366 Cabernet Sauvignon (121), but their arrangement in the genome varied substantially  
367 (Supplemental Figure S5). Chromosomes 12 and 13 contain the largest number of clusters (23 and  
368 22 clusters, respectively) in Trayshed. In Cabernet Sauvignon, clusters were the most numerous  
369 on chromosome 13 and 18 (20 and 18 clusters, respectively). These differences could plausibly  
370 reflect to disparities in disease resistance.

371

### 372 **Expansion of NBS-LRR genes at the *RUN1/RPVI* locus in Trayshed**

373 The clusters of NBS-LRR genes on chromosome 12 in Trayshed are mostly absent from Cabernet  
374 Sauvignon (Figure 2A and 2B). This chromosome contains a known powdery mildew resistance  
375 locus, *RUN1/RPVI* (Pauquet *et al.* 2001), with boundaries defined by the VMC4f3.1 and VMC8g9  
376 SSR markers (Barker *et al.* 2005). This region was studied in Trayshed (chr12: 19,181,246 –  
377 26,483,447 bp) and Cabernet Sauvignon (chr12: 18,746,148 – 23,728,139 bp); it included 355  
378 annotated genes in Trayshed and 287 genes in Cabernet Sauvignon. Within the *RUN1/RPVI* locus,  
379 57 NBS-LRR were identified in Trayshed and 33 in Cabernet Sauvignon.

380

381 Notably, most of the NBS-LRR classes are present for both species in this region, but the TIR-X  
382 class is only present in Trayshed. A phylogenetic analysis of the NBS-LRR proteins at the  
383 *RUN1/RPVI* resistance locus identified two Trayshed-specific clusters (Figure 2C). The timing of  
384 the divergence of these sequences was estimated as described in Massonnet *et al.* (In Press). This  
385 involved aligning corresponding gene coding sequences with MACSE (Ranwez *et al.* 2018) and  
386 calculating the rate of synonymous mutations with yn00 from PAML (Yang 2007). This method  
387 timed the divergence of TIR-X genes at nearly 16 Ma, after the divergence of the *Muscadinia* and  
388 *Vitis* genera (about 18 Ma) (Wan *et al.* 2013). Thus, a recent expansion event of the TIR-X class  
389 genes might have occurred in only *Muscadinia* and other non-TIR classes would have expanded  
390 prior.

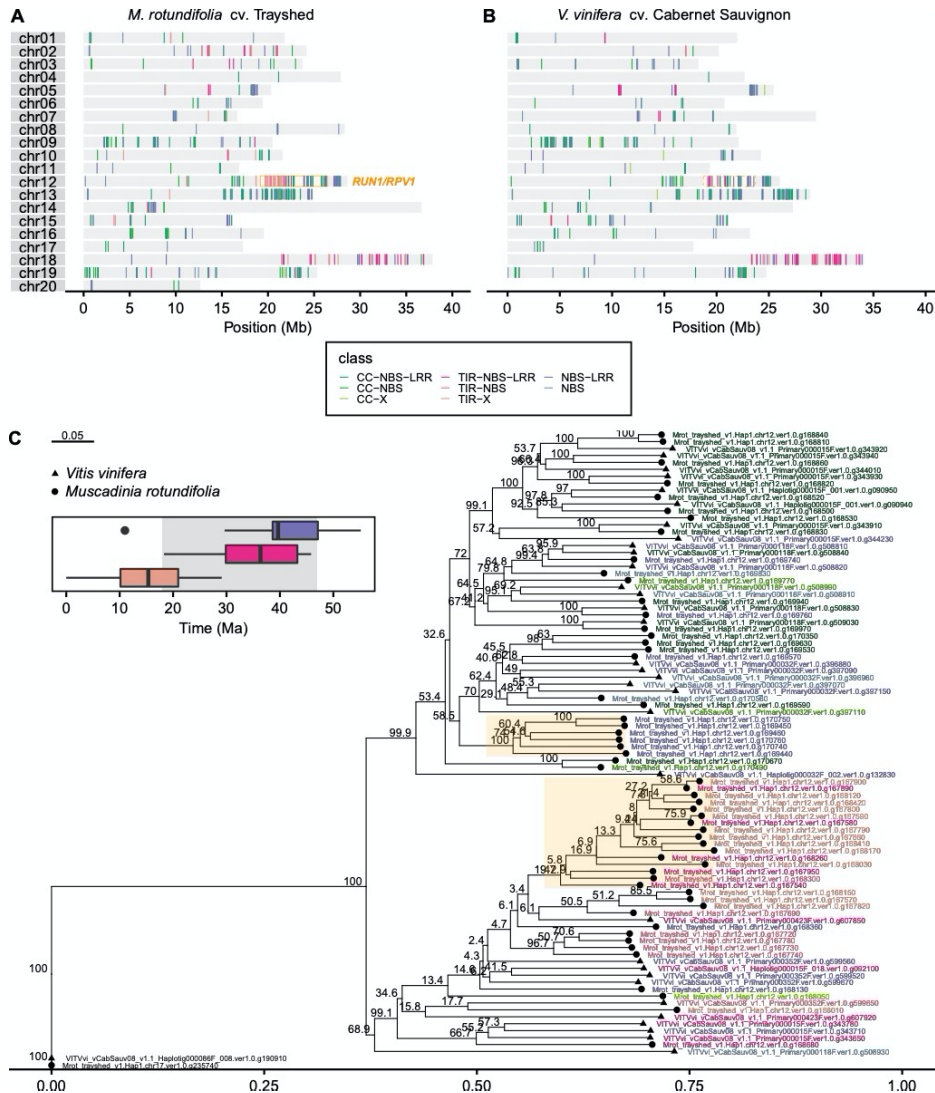

391  
392  
393  
394  
395  
396  
397  
398  
399  
400

**Figure 2: Distribution of NBS-LRR genes in Trayshed and Cabernet Sauvignon genomes**

Location of the different classes of NBS-LRR along the different chromosomes of Trayshed (A) and Cabernet Sauvignon (B). The locations of the resistance locus *RUN1/RPV1* is indicated with an orange box. C. Phylogenetic tree of the NBS-LRR proteins in the *RUN1/RPV1* locus of both Trayshed and Cabernet Sauvignon. The boxplot represents an approximation of the expansion time of the gene clusters highlighted in orange. The approximation of the divergence time between *Vitis* and *Muscadinia* genera is highlighted in grey.

401 A tblastx was done to characterize gene duplication in the *RUN1/RPVI* locus in both Trayshed and  
402 Cabernet Sauvignon. Within the resistance locus boundaries of both genomes (and excluding LTR  
403 retrotransposons), 9,672 genomic regions of Cabernet Sauvignon aligned to 12,346 regions in  
404 Trayshed. These regions intersected 217 Cabernet Sauvignon genes and 250 Trayshed genes.  
405 Genic regions were included in 64.74% of the Cabernet Sauvignon sequences that successfully  
406 aligned to Trayshed, and gene hits made up 67.10% of the total regions hit in Trayshed. On  
407 average, one region in Cabernet Sauvignon had 1.78 hits in Trayshed. For the most duplicated  
408 regions, a single sequence from Cabernet Sauvignon matched up to 15 different regions in  
409 Trayshed (Figure 3). The most duplicated regions in Trayshed (with at least 10 hits matching a  
410 single Cabernet Sauvignon region) were positioned between ~19.7 and 22 Mbp on chromosome  
411 12 (Figure 3) and corresponded to the genomic region identified by Feechan *et al.* (2013). It  
412 includes UDP-glucosyltransferase coding genes followed by resistance gene analogs. In Cabernet  
413 Sauvignon, highly duplicated regions were mostly composed of kinetochore NDC80 complex  
414 genes; these matched genes with similar or NBS-LRR functions in Trayshed.

415  
416 In contrast to Cabernet Sauvignon, Trayshed has more functionally annotated disease-related  
417 genes and an expansion of TIR-X that likely occurred after the divergence of their genera. Similar  
418 research could be undertaken to characterize the genes or features at other known resistance loci  
419 in *Muscadinia rotundifolia*, like *RUN2* and *REN5* (Riaz *et al.* 2011; Blanc *et al.* 2012). Acquiring  
420 this understanding could be expedited with the availability of high-quality reference sequences for  
421 resistant selections, like Trayshed, and susceptible cultivars, like Cabernet Sauvignon and others  
422 (Massonnet *et al.* In Press).



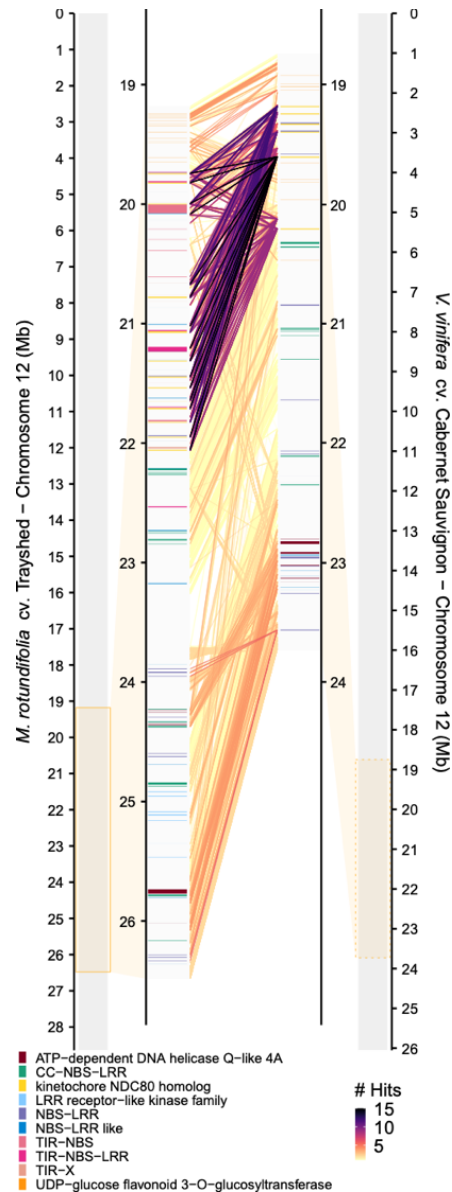

423  
424  
425  
426  
427  
428  
429  
430  
431  
432

### Figure 3: Synteny between the *RUN1/RPV1* locus in Trayshed and Cabernet Sauvignon

Chromosome 12 of Trayshed (left) and Cabernet Sauvignon (right) are shown. The *RUN1/RPV1* resistance locus is highlighted with an orange box for both genotypes. Syntenic gene content within the locus is shown in the center of the figure. Connections were labeled based on tblastx results. Duplications of Cabernet Sauvignon sequences are represented by the color gradient. Highly duplicated sequences in Trayshed are dark purple. The functional annotations depicted include descriptions represented by at least 10 genes or related to NBS-LRR.

### ACKNOWLEDGMENTS

This work was funded by the NSF grant #1741627 and partially supported by funds to D.C. from the E. & J. Gallo Winery and the Louis P. Martini Endowment in Viticulture.

436 **LITERATURE CITED**

- 437 Au, K. F., J. G. Underwood, L. Lee, and W. H. Wong, 2012 Improving PacBio Long Read  
438 Accuracy by Short Read Alignment (Y. Xing, Ed.). PLoS ONE 7: e46679.
- 439 Bailey, T. L., and C. Elkan, 1994 Fitting a mixture model by expectation maximization to  
440 discover motifs in biopolymers. Proc Int Conf Intell Syst Mol Biol 2: 28–36.
- 441 Barker, C. L., T. Donald, J. Pauquet, M. B. Ratnaparkhe, A. Bouquet *et al.*, 2005 Genetic and  
442 physical mapping of the grapevine powdery mildew resistance gene, Run1, using a  
443 bacterial artificial chromosome library. Theor Appl Genet 111: 370–377.
- 444 Bertier, L., L. Leus, L. D’hondt, A. W. A. M. de Cock, and M. Höfte, 2013 Host Adaptation and  
445 Speciation through Hybridization and Polyploidy in *Phytophthora*. PLOS ONE 8:  
446 e85385.
- 447 Blanc, S., S. Wiedemann-Merdinoglu, V. Dumas, P. Mestre, and D. Merdinoglu, 2012 A  
448 reference genetic map of *Muscadinia rotundifolia* and identification of Ren5, a new major  
449 locus for resistance to grapevine powdery mildew. Theor Appl Genet 125: 1663–1675.
- 450 Blanco-Ulate, B., E. Vincenti, A. L. T. Powell, and D. Cantu, 2013 Tomato transcriptome and  
451 mutant analyses suggest a role for plant stress hormones in the interaction between fruit  
452 and *Botrytis cinerea*. Front. Plant Sci. 4: 142.
- 453 Boratyn, G. M., J. Thierry-Mieg, D. Thierry-Mieg, B. Busby, and T. L. Madden, 2019 Magic-  
454 BLAST, an accurate RNA-seq aligner for long and short reads. BMC Bioinformatics 20:  
455 405.
- 456 Bouquet, A., 1978 La muscadine (*Vitis rotundifolia* michx) et sa culture aux Etats-Unis. OENO  
457 One 12: 1–20.
- 458 Bouquet, A., 1980 *Vitis* x *Muscadinia* hybridization: A new way in grape breeding for disease  
459 resistance in France, pp. 42–61 in *Proceedings of the 3rd International Symposium on*  
460 *Grape Breeding*, University of California, Davis, Department of Viticulture and Enology.
- 461 Branas, M. M., 1932 Sur la caryologie des Ampélidées. C R Acad Sci Paris 194: 121–123.
- 462 Camacho, C., G. Coulouris, V. Avagyan, N. Ma, J. Papadopoulos *et al.*, 2009 BLAST+:  
463 architecture and applications. BMC Bioinformatics 10: 421.
- 464 Canaguier, A., J. Grimplet, G. Di Gaspero, S. Scalabrin, E. Duchene *et al.*, 2017 A new version  
465 of the grapevine reference genome assembly (12X.v2) and of its annotation (VCost.v3).  
466 Genom Data 14: 56–62.
- 467 Charif, D., and J. R. Lobry, 2007 SeqinR 1.0-2: A Contributed Package to the R Project for  
468 Statistical Computing Devoted to Biological Sequences Retrieval and Analysis, pp. 207–  
469 232 in *Structural Approaches to Sequence Evolution: Molecules, Networks, Populations*,  
470 edited by U. Bastolla, M. Porto, H. E. Roman, and M. Vendruscolo. Springer Berlin  
471 Heidelberg, Berlin, Heidelberg.
- 472 Chin, C.-S., D. H. Alexander, P. Marks, A. A. Klammer, J. Drake *et al.*, 2013 Nonhybrid,  
473 finished microbial genome assemblies from long-read SMRT sequencing data. Nat  
474 Methods 10: 563–569.
- 475 Chin, C.-S., P. Peluso, F. J. Sedlazeck, M. Nattestad, G. T. Concepcion *et al.*, 2016 Phased  
476 diploid genome assembly with single-molecule real-time sequencing. Nat Methods  
477 13:474 1050–1054.
- 478 Chu, Z.-F., J. Wen, Y.-P. Yang, Z.-L. Nie, and Y. Meng, 2018 Genome size variation and  
479 evolution in the grape family Vitaceae: Genome size variation in Vitaceae. Jnl of  
480 Sytematics Evolution 56: 273–282.

- 481 Davidis, U. X., and H. P. Olmo, 1964 The *Vitis vinifera* x *V. rotundifolia* hybrids as phylloxera  
482 resistant rootstocks. *Vitis* 4: 129–143.
- 483 Dearing, C., 1917 Muscadine grape breeding. *J. Hered.* 8: 409–424.
- 484 Delame, M., E. Prado, S. Blanc, G. Robert-Siegwald, C. Schneider *et al.*, 2019 Introgression  
485 reshapes recombination distribution in grapevine interspecific hybrids. *Theor Appl Genet*  
486 132: 1073–1087.
- 487 Doležel, J., and J. Bartoš, 2005 Plant DNA Flow Cytometry and Estimation of Nuclear Genome  
488 Size. *Ann. Bot.* 95: 99–110.
- 489 Doležel, J., S. Sgorbati, and S. Lucretti, 1992 Comparison of three DNA fluorochromes for flow  
490 cytometric estimation of nuclear DNA content in plants. *Physiol. Plant.* 85: 625–631.
- 491 Edgar, R. C., 2004 MUSCLE: multiple sequence alignment with high accuracy and high  
492 throughput. *Nucleic Acids Res.* 32: 1792–1797.
- 493 El-Gebali, S., J. Mistry, A. Bateman, S. R. Eddy, A. Luciani *et al.*, 2019 The Pfam protein  
494 families database in 2019. *Nucleic Acids Res.* 47: D427–D432.
- 495 English, A. C., S. Richards, Y. Han, M. Wang, V. Vee *et al.*, 2012 Mind the Gap: Upgrading  
496 Genomes with Pacific Biosciences RS Long-Read Sequencing Technology. *PLoS ONE*  
497 7: e47768.
- 498 English, A. C., W. J. Salerno, and J. G. Reid, 2014 PBHoney: identifying genomic variants via  
499 long-read discordance and interrupted mapping. *BMC Bioinformatics* 15: 180.
- 500 Feechan, A., C. Anderson, L. Torregrosa, A. Jermakow, P. Mestre *et al.*, 2013 Genetic dissection  
501 of a TIR-NB-LRR locus from the wild North American grapevine species *Muscadinia*  
502 *rotundifolia* identifies paralogous genes conferring resistance to major fungal and  
503 oomycete pathogens in cultivated grapevine. *Plant J* 76: 661–674.
- 504 Firoozabady, E., and H. P. Olmo, 1982 Resistance to grape phylloxera in *Vitis vinifera* x *V.*  
505 *rotundifolia* grape hybrids. *Vitis* 21: 1–4.
- 506 Garnier, S., 2018 *viridis: Default Color Maps from “matplotlib.”*
- 507 Gotz, S., J. M. Garcia-Gomez, J. Terol, T. D. Williams, S. H. Nagaraj *et al.*, 2008 High-  
508 throughput functional annotation and data mining with the Blast2GO suite. *Nucleic Acids*  
509 *Res.* 36: 3420–3435.
- 510 Grabherr, M. G., B. J. Haas, M. Yassour, J. Z. Levin, D. A. Thompson *et al.*, 2011 Full-length  
511 transcriptome assembly from RNA-Seq data without a reference genome. *Nat.*  
512 *Biotechnol.* 29: 644–652.
- 513 Grant, C. E., T. L. Bailey, and W. S. Noble, 2011 FIMO: scanning for occurrences of a given  
514 motif. *Bioinformatics* 27: 1017–1018.
- 515 Haas, B. J., 2003 Improving the Arabidopsis genome annotation using maximal transcript  
516 alignment assemblies. *Nucleic Acids Res.* 31: 5654–5666.
- 517 Haas, B. J., S. L. Salzberg, W. Zhu, M. Pertea, J. E. Allen *et al.*, 2008 Automated eukaryotic  
518 gene structure annotation using EVIDENCEModeler and the Program to Assemble Spliced  
519 Alignments. *Genome Biol* 9: R7.
- 520 He, H., S. Zhu, R. Zhao, Z. Jiang, Y. Ji *et al.*, 2018 Pm21, Encoding a Typical CC-NBS-LRR  
521 Protein, Confers Broad-Spectrum Resistance to Wheat Powdery Mildew Disease. *Mol.*  
522 *Plant* 11: 879–882.
- 523 Heintz, C. C., J. Uretsky, J. C. Dodson Peterson, K. G. Huerta-Acosta, and M. A. Walker, 2019  
524 Crop Wild Relatives of Grape (*Vitis vinifera* L.) Throughout North America, pp. 329–  
525 351 in *North American Crop Wild Relatives, Volume 2: Important Species*, edited by S.

- 526 L. Greene, K. A. Williams, C. K. Khoury, M. B. Kantar, and L. F. Marek. Springer  
527 International Publishing, Cham.
- 528 Holub, E. B., 2001 The arms race is ancient history in *Arabidopsis*, the wildflower. *Nat Rev*  
529 *Genet* 2: 516–527.
- 530 Hulbert, S. H., C. A. Webb, S. M. Smith, and Q. Sun, 2001 RESISTANCE GENE  
531 COMPLEXES: Evolution and Utilization. *Annu. Rev. Phytopathol.* 39: 285–312.
- 532 Jaillon, O., J. M. Aury, B. Noel, A. Policriti, C. Clepet *et al.*, 2007 The grapevine genome  
533 sequence suggests ancestral hexaploidization in major angiosperm phyla. *Nature* 449:  
534 463–468.
- 535 Jo, J., J. Venkatesh, K. Han, H.-Y. Lee, G. J. Choi *et al.*, 2017 Molecular Mapping of PMR1, a  
536 Novel Locus Conferring Resistance to Powdery Mildew in Pepper (*Capsicum annuum*).  
537 *Front. Plant Sci.* 8: 2090.
- 538 Jones, P., D. Binns, H.-Y. Chang, M. Fraser, W. Li *et al.*, 2014 InterProScan 5: genome-scale  
539 protein function classification. *Bioinformatics* 30: 1236–1240.
- 540 Karkamkar, S. P., S. G. Patil, and S. C. Misra, 2010 Cyto-morphological studies and their  
541 significance in evolution of family Vitaceae. *Nucleus* 53: 37–43.
- 542 Kent, W. J., 2002 BLAT : The Blast-Like Alignment Tool. *Genome Res.* 12: 656–664.
- 543 Korf, I., 2004 Gene finding in novel genomes. *BMC Bioinformatics* 5: 59.
- 544 Lam, E. T., A. Hastie, C. Lin, D. Ehrlich, S. K. Das *et al.*, 2012 Genome mapping on  
545 nanochannel arrays for structural variation analysis and sequence assembly. *Nat*  
546 *Biotechnol* 30: 771–776.
- 547 Lawrence, M., R. Gentleman, and V. Carey, 2009 rtracklayer: an R package for interfacing with  
548 genome browsers. *Bioinformatics* 25: 1841–1842.
- 549 Lawrence, M., W. Huber, H. Pagès, P. Aboyoun, M. Carlson *et al.*, 2013 Software for  
550 Computing and Annotating Genomic Ranges (A. Prlic, Ed.). *PLoS Comput Biol* 9:  
551 e1003118.
- 552 Lewter, J., M. L. Worthington, J. R. Clark, A. V. Varanasi, L. Nelson *et al.*, 2019 High-density  
553 linkage maps and loci for berry color and flower sex in muscadine grape (*Vitis*  
554 *rotundifolia*). *Theor Appl Genet* 132: 1571–1585.
- 555 Liu, X.-Q., S. M. Ickert-Bond, Z.-L. Nie, Z. Zhou, L.-Q. Chen *et al.*, 2016 Phylogeny of the  
556 Ampelocissus–*Vitis* clade in Vitaceae supports the New World origin of the grape genus.  
557 *Mol Phylogenet Evol* 95: 217–228.
- 558 Lomsadze, A., 2005 Gene identification in novel eukaryotic genomes by self-training algorithm.  
559 *Nucleic Acids Res.* 33: 6494–6506.
- 560 Lupas, A., M. Van Dyke, and J. Stock, 1991 Predicting coiled coils from protein sequences.  
561 *Science* 252: 1162–1164.
- 562 Ma, Z.-Y., J. Wen, S. M. Ickert-Bond, Z.-L. Nie, L.-Q. Chen *et al.*, 2018 Phylogenomics,  
563 biogeography, and adaptive radiation of grapes. *Mol Phylogenet Evol* 129: 258–267.
- 564 Marçais, G., A. L. Delcher, A. M. Phillippy, R. Coston, S. L. Salzberg *et al.*, 2018 MUMmer4: A  
565 fast and versatile genome alignment system (A. E. Darling, Ed.). *PLoS Comput Biol* 14:  
566 e1005944.
- 567 Massonnet, M., N. Cochetel, A. Minio, A. M. Vondras, A. Muyle *et al.*, In Press The genetic  
568 basis of sex determination in grapevines ( *Vitis spp.* ). *Nature Communications*. doi:  
569 10.1101/2019.12.11.861377.

- 570 Merdinoglu, D., C. Schneider, E. Prado, S. Wiedemann-Merdinoglu, and P. Mestre, 2018  
571 Breeding for durable resistance to downy and powdery mildew in grapevine. *OENO One*  
572 52: 203–209.
- 573 Merdinoglu, D., S. Wiedeman-Merdinoglu, P. Coste, V. Dumas, S. Haetty *et al.*, 2003 Genetic  
574 analysis of downy mildew resistance derived from *Muscadinia rotundifolia*. *Acta Hortic.*  
575 603: 451–456.
- 576 Meyers, B. C., A. Kozik, A. Griego, H. Kuang, and R. W. Michelmore, 2003 Genome-Wide  
577 Analysis of NBS-LRR–Encoding Genes in *Arabidopsis*. *Plant Cell* 15: 809–834.
- 578 Minio, A., M. Massonnet, R. Figueroa-Balderas, A. Castro, and D. Cantu, 2019 Diploid Genome  
579 Assembly of the Wine Grape Carménère. *G3: Genes|Genomes|Genetics* 9: 1331–1337.
- 580 Myers, G., 2014 Efficient Local Alignment Discovery amongst Noisy Long Reads, pp. 52–67 in  
581 Algorithms in Bioinformatics, edited by D. Brown and B. Morgenstern. Springer Berlin  
582 Heidelberg, Berlin, Heidelberg.
- 583 Olien, W. C., 1990 The Muscadine Grape: Botany, Viticulture, History, and Current Industry.  
584 *HortSci* 25: 732–739.
- 585 Olmo, H. P., 1937 Chromosome Numbers in the European Grape (*Vitis vinifera*). *CYTOLOGIA*  
586 Fujii Jubilae: 606–613.
- 587 Olmo, H. P., 1986 The potential role of (*vinifera* x *rotundifolia*) hybrids in grape variety  
588 improvement. *Experientia* 42: 921–926.
- 589 Olmo, H. P., 1971 *Vinifera Rotundifolia* Hybrids as Wine Grapes. *Am. J. Enol. Vitic.* 22: 87–91.
- 590 Pagès, H., P. Aboyoun, R. Gentleman, and S. DebRoy, 2019 Biostrings: Efficient manipulation  
591 of biological strings.
- 592 Paradis, E., and K. Schliep, 2019 ape 5.0: an environment for modern phylogenetics and  
593 evolutionary analyses in R (R. Schwartz, Ed.). *Bioinformatics* 35: 526–528.
- 594 Patel, G. I., and H. P. Olmo, 1955 Cytogenetics of *Vitis*: I. The hybrid *V. vinifera* x *V.*  
595 *rotundifolia*. *Am. J. Bot.* 42: 141–159.
- 596 Patil, S. G., and V. P. Patil, 1992 Karyomorphology of *Vitis vinifera*, *V. rotundifolia* and their  
597 hybrid. *Cytologia* 57: 91–95.
- 598 Pauquet, J., A. Bouquet, P. This, and A.-F. Adam-Blondon, 2001 Establishment of a local map  
599 of AFLP markers around the powdery mildew resistance gene *Run1* in grapevine and  
600 assessment of their usefulness for marker assisted selection. *Theor Appl Genet* 103:  
601 1201–1210.
- 602 Perte, M., G. M. Perte, C. M. Antonescu, T.-C. Chang, J. T. Mendell *et al.*, 2015 StringTie  
603 enables improved reconstruction of a transcriptome from RNA-seq reads. *Nat Biotechnol*  
604 33: 290–295.
- 605 R Core Team, 2019 *R: A language and environment for statistical computing*. R Foundation for  
606 Statistical Computing, Vienna, Austria.
- 607 Ranwez, V., E. J. P. Douzery, C. Cambon, N. Chantret, and F. Delsuc, 2018 MACSE v2: Toolkit  
608 for the Alignment of Coding Sequences Accounting for Frameshifts and Stop Codons (C.  
609 Wilke, Ed.). *Mol Biol Evol* 35: 2582–2584.
- 610 Ravaz, L., 1902 *Les Vignes américaines. Porte greffes et producteurs directs, caractères,*  
611 *aptitudes.*
- 612 Riaz, S., A. C. Tenschler, D. W. Ramming, and M. A. Walker, 2011 Using a limited mapping  
613 strategy to identify major QTLs for resistance to grapevine powdery mildew (*Erysiphe*  
614 *necator*) and their use in marker-assisted breeding. *Theor Appl Genet* 122: 1059–1073.



- 615 Richly, E., J. Kurth, and D. Leister, 2002 Mode of Amplification and Reorganization of  
616 Resistance Genes During Recent *Arabidopsis thaliana* Evolution. *Mol Biol Evol* 19: 76–  
617 84.
- 618 RStudio Team, 2019 *RStudio: Integrated Development Environment for R*. RStudio, Inc.,  
619 Boston, MA.
- 620 Ruel, J. J., and M. A. Walker, 2006 Resistance to Pierce’s Disease in *Muscadinia rotundifolia*  
621 and Other Native Grape Species. *Am. J. Enol. Vitic.* 57: 158–165.
- 622 Seppey, M., M. Manni, and E. M. Zdobnov, 2019 BUSCO: Assessing Genome Assembly and  
623 Annotation Completeness, pp. 227–245 in *Gene Prediction: Methods and Protocols*,  
624 edited by M. Kollmar. Springer New York, New York, NY.
- 625 Slater, G., and E. Birney, 2005 Automated generation of heuristics for biological sequence  
626 comparison. *BMC Bioinformatics* 6: 31.
- 627 Small, J. K., 1913 *Flora of the southeastern United States: being descriptions of the seed-plants,*  
628 *ferns and fern-allies growing naturally in North Carolina, South Carolina, Georgia,*  
629 *Florida, Tennessee, Alabama, Mississippi, Arkansas, Louisiana and in Oklahoma and*  
630 *Texas east of the one hundredth meridian*. J.K. Small, New York.
- 631 Smit, A., R. Hubley, and P. Green, 2013 *RepeatMasker Open-4.0*.
- 632 Sousa, A., and S. S. Renner, 2015 Interstitial telomere-like repeats in the monocot family  
633 Araceae: Chromosome Evolution in the Araceae. *Bot J Linn Soc* 177: 15–26.
- 634 Stanke, M., O. Keller, I. Gunduz, A. Hayes, S. Waack *et al.*, 2006 AUGUSTUS: ab initio  
635 prediction of alternative transcripts. *Nucleic Acids Res.* 34: W435–W439.
- 636 Staudt, G., and H. H. Kassemeyer, 1995 Evaluation of downy mildew resistance in various  
637 accessions of wild *Vitis* species. *Vitis* 34: 225–228.
- 638 Vondras, A. M., A. Minio, B. Blanco-Ulate, R. Figueroa-Balderas, M. A. Penn *et al.*, 2019 The  
639 genomic diversification of grapevine clones. *BMC Genomics* 20: 972.
- 640 Wagih, O., 2017 *ggseqlogo: A “ggplot2” Extension for Drawing Publication-Ready Sequence*.
- 641 Walker, M. A., L. A. Lider, A. C. Goheen, and H. P. Olmo, 1991 VR 039-16 Grape Rootstock.  
642 *HortSci* 26: 1224–1225.
- 643 Walker, M. A., K. Lund, C. Agüero, S. Riaz, K. Fort *et al.*, 2014 Breeding grape rootstocks for  
644 resistance to phylloxera and nematodes - it’s not always easy. *Acta Hort.* 1045: 89–97.
- 645 Wan, Y., H. R. Schwaninger, A. M. Baldo, J. A. Labate, G.-Y. Zhong *et al.*, 2013 A  
646 phylogenetic analysis of the grape genus (*Vitis* L.) reveals broad reticulation and  
647 concurrent diversification during neogene and quaternary climate change. *BMC Evol*  
648 *Biol* 13: 141.
- 649 Wang, Y., H. Tang, J. D. DeBarry, X. Tan, J. Li *et al.*, 2012 MCSanX: a toolkit for detection  
650 and evolutionary analysis of gene synteny and collinearity. *Nucleic Acids Res.* 40: e49.
- 651 Warren, R. F., A. Henk, P. Mowery, E. Holub, and R. W. Innes, 1998 A Mutation within the  
652 Leucine-Rich Repeat Domain of the *Arabidopsis* Disease Resistance Gene RPS5 Partially  
653 Suppresses Multiple Bacterial and Downy Mildew Resistance Genes. *Plant Cell* 10:  
654 1439–1452.
- 655 Wei, F., K. Gobelman-Werner, S. M. Morroll, J. Kurth, and L. Mao, 1999 The Mla (Powdery  
656 Mildew) Resistance Cluster Is Associated With Three NBS-LRR Gene Families and  
657 Suppressed Recombination Within a 240-kb DNA Interval on Chromosome 5S (1HS) of  
658 Barley. *Genetics* 153: 1929–1948.

- 659 Wen, J., L.-M. Lu, Z.-L. Nie, X.-Q. Liu, N. Zhang *et al.*, 2018 A new phylogenetic tribal  
660 classification of the grape family (Vitaceae): Tribal classification of Vitaceae. *Jnl of*  
661 *Sytematics Evolution* 56: 262–272.
- 662 Wickham, H., M. Averick, J. Bryan, W. Chang, L. McGowan *et al.*, 2019 Welcome to the  
663 Tidyverse. *Journal of Open Source Software* 4: 1686.
- 664 Wu, T. D., and C. K. Watanabe, 2005 GMAP: a genomic mapping and alignment program for  
665 mRNA and EST sequences. *Bioinformatics* 21: 1859–1875.
- 666 Yang, Z., 2007 PAML 4: Phylogenetic Analysis by Maximum Likelihood. *Mol Biol Evol* 24:  
667 1586–1591.
- 668 Yu, G., D. K. Smith, H. Zhu, Y. Guan, and T. T.-Y. Lam, 2017 ggtree: an r package for  
669 visualization and annotation of phylogenetic trees with their covariates and other  
670 associated data. *Methods Ecol. Evol.* 8: 28–36.
- 671 Zhou, F., J. Kurth, F. Wei, C. Elliott, G. Valè *et al.*, 2001 Cell-Autonomous Expression of Barley  
672 Mla1 Confers Race-Specific Resistance to the Powdery Mildew Fungus via a Rar1-  
673 Independent Signaling Pathway. *Plant Cell* 13: 337–350.
- 674 Zini, E., C. Dolzani, M. Stefanini, V. Gratl, P. Bettinelli *et al.*, 2019 R-Loci Arrangement Versus  
675 Downy and Powdery Mildew Resistance Level: A Vitis Hybrid Survey. *IJMS* 20: 3526.
